# Supplementary material
Source: PubMed Central journal article supplement (PMC8826847)
Supplement: NIHMS1060172-supplement-Supplementary_Table_S1.pdf [file NIHMS1060172-supplement-Supplementary_Table_S1.pdf]

S1 | Some characteristic properties of polymers that can be used to produce biocompatible micro- and nanobeads.

| Polymer       | Type               | Chemical Structure                                                                                                                               | Solubility                      | Cross-linker agent & method            | References (TB applications italicized) |
|---------------|--------------------|--------------------------------------------------------------------------------------------------------------------------------------------------|---------------------------------|----------------------------------------|-----------------------------------------|
| PLGA          | Linear             | 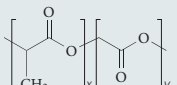                                                                | DCM<br>Acetone<br>Ethyl-acetate | Beads preparation by emulsion          | 1–4                                     |
| Alginate      | Linear<br>Anionic  |                                                                 | Water                           | GDL, Ca+2 (physical)<br>EDC (chemical) | 5–8                                     |
| Chitosan      | Linear<br>Cationic |                                                                 | Acidic<br>pH ~ 3                | TPP (physical)<br>GP, GA (chemical)    | 9–11                                    |
| Hyaluronan    | Linear<br>Anionic  |                                                                 | Water                           | EDC (chemical)                         | 10,12                                   |
| Dextran       | Branched           |                                                                 | Water                           | DVS, EGDE (chemical)                   | 10,12,13                                |
| HEC           | Linear             | <br>R: H or (CH <sub>2</sub> CH <sub>2</sub> O) <sub>x</sub> H | Water                           | DVS, EGDE (chemical)                   | 14,15                                   |
| HEC-g-PNIPAAm | Grafted<br>Anionic |                                                               | Water                           | DVS, EGDE (chemical)                   | 14,15                                   |

PLGA: Poly(lactic-co-glycolic acid); HEC: Hydroxyethylcellulose; GDL: Glucono- $\delta$ -lactone; EDC: 1-(3-Dimethylaminopropyl)-3-ethylcarbodiimide; TPP: Tripolyphosphate; GP: Genipin; GA: Glutaraldehyde; DVS: Divinylsulfone; EGDE: Ethylene glycol diglycidyl ether

- Sosnik, A., Carcaboso, A. M., Glisoni, R. J., Moretton, M. A. & Chiappetta, D. A. New old challenges in tuberculosis: potentially effective nanotechnologies in drug delivery. *Adv. Drug Deliv. Rev.* **62**, 547–559 (2010).
- Singh, R. & Lillard, J. W. Jr. Nanoparticle-based targeted drug delivery. *Exp. Mol. Pathol.* **86**, 215–223 (2009).
- Sharma, A., Sharma, S. & Khuller, G. K. Lectin-functionalized poly (lactide-co-glycolide) nanoparticles as oral/aerosolized antitubercular drug carriers for treatment of tuberculosis. *J. Antimicrob. Chemother.* **54**, 761–766 (2004).
- Muttill, P., Wang, C. & Hickey, A. J. Inhaled Drug Delivery for Tuberculosis Therapy. *Pharm. Res.* (2009).
- Couvreur, P. & Vauthier, C. Nanotechnology: intelligent design to treat complex disease. *Pharm. Res.* **23**, 1417–1450 (2006).
- Ahmad, Z. & Khuller, G. K. Alginate-based sustained release drug delivery systems for tuberculosis. *Expert Opin. Drug Deliv.* **5**, 1323–1334 (2008).
- Ahmad, Z., Sharma, S. & Khuller, G. K. Chemotherapeutic evaluation of alginate nanoparticle-encapsulated azole antifungal and antitubercular drugs against murine tuberculosis. *Nanomedicine* **3**, 239–243 (2007).
- Ajdary, S. *et al.* Oral administration of BCG encapsulated in alginate microspheres induces strong T<sub>H</sub>1 response in BALB/c mice. *Vaccine* **25**, 4595–4601 (2007).
- Bivas-Benita, M. *et al.* Pulmonary delivery of chitosan-DNA nanoparticles enhances the immunogenicity of a DNA vaccine encoding HLA-A\*0201-restricted T-cell epitopes of *Mycobacterium tuberculosis*. *Vaccine* **22**, 1609–1615 (2004).
- Liu, Z. Polysaccharides-based nanoparticles as drug delivery systems. *Adv. Drug Deliv. Rev.* **60**, 1650–1662 (2008).
- Tian, X. X. & Groves, M. J. Formulation and biological activity of antineoplastic proteoglycans derived from *Mycobacterium vaccae* in chitosan nanoparticles. *J. Pharm. Pharmacol.* **51**, 151–157 (1999).
- Coviello, T., Matricardi, P., Marianecchi, C. & Alhaique, F. Polysaccharide hydrogels for modified release formulations. *J. Control. Release* **119**, 5–24 (2007).
- Li, Y. L. *et al.* Reversibly stabilized multifunctional dextran nanoparticles efficiently deliver doxorubicin into the nuclei of cancer cells. *Angew. Chem. Int. Ed. Engl.* **48**, 9914–9918 (2009).
- Maleki, A., Kjoniksen, A. L. & Nystrom, B. Effect of shear on intramolecular and intermolecular association during cross-linking of hydroxyethylcellulose in dilute aqueous solutions. *J. Phys. Chem. B* **109**, 12329–12336 (2005).
- Rodriguez, R., Alvarez-Lorenzo, C. & Concheiro, A. Cationic cellulose hydrogels: kinetics of the cross-linking process and characterization as pH-/ion-sensitive drug delivery systems. *J. Control. Release* **86**, 253–265 (2003).
